# Supplementary material for: A Study of the Psychometric Properties of the Social Support Scale for Children
Source: Springer Nature journal article supplement (doi:10.1007/s10862-013-9383-0), 2013-10-08
Supplement: MOESM1 [file 571996]

|  | Item 1 | Item 2 | Item 3 | Item 4 | Item 5 | Item 6 | Item 7 | Item 8 | Item 9 | Item 10 | Item 11 | Item 12 | Item 13 | Item 14 | Item 15 | Item 16 | Item 17 | Item 18 | Item 19 | Item 20 | Item 21 | Item 22 | Item 23 |
| --- | --- | --- | --- | --- | --- | --- | --- | --- | --- | --- | --- | --- | --- | --- | --- | --- | --- | --- | --- | --- | --- | --- | --- |
| Item 1 | - |  |  |  |  |  |  |  |  |  |  |  |  |  |  |  |  |  |  |  |  |  |  |
| Item 2 | .16** | - |  |  |  |  |  |  |  |  |  |  |  |  |  |  |  |  |  |  |  |  |  |
| Item 3 | .12* | .03 | - |  |  |  |  |  |  |  |  |  |  |  |  |  |  |  |  |  |  |  |  |
| Item 4 | .18** | .17** | .17** | - |  |  |  |  |  |  |  |  |  |  |  |  |  |  |  |  |  |  |  |
| Item 5 | .39** | .11 | .05 | .18** | - |  |  |  |  |  |  |  |  |  |  |  |  |  |  |  |  |  |  |
| Item 6 | .21** | .36** | .09 | .33** | .12 | - |  |  |  |  |  |  |  |  |  |  |  |  |  |  |  |  |  |
| Item 7 | .26** | .01 | .23** | .10 | .25** | .13* | - |  |  |  |  |  |  |  |  |  |  |  |  |  |  |  |  |
| Item 8 | .23** | .21** | .14* | .54** | .08 | .31** | .10 | - |  |  |  |  |  |  |  |  |  |  |  |  |  |  |  |
| Item 9 | .38** | .19** | .02 | .16** | .43** | .20** | .18** | .17** | - |  |  |  |  |  |  |  |  |  |  |  |  |  |  |
| Item 10 | .18** | .32** | .07 | .06 | .12* | .23** | .01 | .13* | .15* | - |  |  |  |  |  |  |  |  |  |  |  |  |  |
| Item 11 | .09 | .07 | .41** | .25** | .05 | .17** | .28** | .21** | .19** | .03 | - |  |  |  |  |  |  |  |  |  |  |  |  |
| Item 12 | .13* | .20** | .13* | .56** | .11 | .41** | .11 | .63** | .18** | .07 | .27** | - |  |  |  |  |  |  |  |  |  |  |  |
| Item 13 | .39** | .13* | .02 | .20** | .42** | .11 | .27** | .23** | .54** | .10 | .15* | .19** | - |  |  |  |  |  |  |  |  |  |  |
| Item 14 | .15* | .32** | .14* | .14* | .03 | .32** | .05 | .23** | .15* | .27** | .08 | .24** | .14* | - |  |  |  |  |  |  |  |  |  |
| Item 15 | .19** | .10 | .36** | .29** | .24** | .16** | .31** | .17** | .08 | .05 | .41** | .21** | .17** | .09 | - |  |  |  |  |  |  |  |  |
| Item 16 | .26** | .11 | .15* | .39** | .20** | .26** | .16* | .28** | .24** | .06 | .24** | .33** | .22** | .10 | .30** | - |  |  |  |  |  |  |  |
| Item 17 | .29** | .09 | .08 | .21** | .31** | .14* | .22** | .08 | .33** | .01 | .11 | .15* | .47** | .05 | .12 | .22** | - |  |  |  |  |  |  |
| Item 18 | .11 | .29** | .14* | .27** | .05 | .40** | .05 | .26** | .11 | .26** | .16* | .32** | .14* | .33** | .19** | .30** | .10 | - |  |  |  |  |  |
| Item 19 | .12 | .12* | .38** | .15* | .09 | .07 | .22** | .10 | .18** | .19** | .51** | .19** | .07 | .10 | .35** | .19** | .02 | .16** | - |  |  |  |  |
| Item 20 | .24** | .17** | .15* | .40** | .16** | .35** | .20** | .37** | .26** | .16** | .31** | .42** | .22** | .14* | .21** | .40** | .19** | .41** | .14* | - |  |  |  |
| Item 21 | .33** | .08 | -.04 | .11 | .34** | .04 | .10 | .12* | .34** | .15* | .07 | .13* | .49** | .10 | .09 | .11 | .25** | .07 | .13* | .12* | - |  |  |
| Item 22 | .14* | .25** | .11 | .20** | .13* | .26** | .02 | .23** | .16** | .21** | .15* | .22** | .18** | .28** | .11 | .22** | .12* | .41** | .10 | .13* | .19** | - |  |
| Item 23 | .04 | .15* | .33** | .27** | .10 | .16* | .20** | .23** | .19** | .09 | .49** | .27** | .24** | .18** | .31** | .21** | .14* | .08 | .35** | .21** | .05 | .15* | - |
| Item 24 | .15* | .17** | .15* | .45** | .23** | .31** | .12* | .40** | .25** | .13* | .26** | .46** | .22** | .20** | .16** | .32** | .15* | .26** | .20** | .40** | .13* | .20** | .34** |
